# Supplementary material
Source: PubMed Central journal article supplement (PMC5636212)
Supplement: NIHMS872254-supplement-supplement_1.pdf [file NIHMS872254-supplement-supplement_1.pdf]

**Table S2a.** Distribution of urinary metabolites (ng/ml) for 31 glass-plastic duplicates.

|               | <b>N &gt; MDL (%)<sup>a</sup></b> | <b>GM (95% CI)</b> | <b>Minimum</b> | <b>25th Pctl</b> | <b>50th Pctl</b> | <b>75th Pctl</b> | <b>Maximum</b> |
|---------------|-----------------------------------|--------------------|----------------|------------------|------------------|------------------|----------------|
| <b>BCIPP</b>  | 0 (0)                             | <MDL               | <MDL           | <MDL             | <MDL             | <MDL             | <MDL           |
| <b>BDCIPP</b> | 31 (100)                          | 0.83 (0.53, 1.3)   | 0.06           | 0.31             | 0.81             | 2.17             | 9.87           |
| <b>DPHP</b>   | 31 (100)                          | 1.06 (0.8, 1.41)   | 0.19           | 0.77             | 1.01             | 1.66             | 7.19           |
| <b>ip-PPP</b> | 31 (100)                          | 0.29 (0.23, 0.37)  | 0.06           | 0.19             | 0.33             | 0.55             | 0.65           |
| <b>tb-PPP</b> | 1 (3)                             | <MDL               | <MDL           | <MDL             | <MDL             | <MDL             | 0.32           |

<sup>a</sup>Each pair of duplicates was considered >MDL when one or more duplicate was >MDL.

Summary statistics calculated using geometric mean concentrations from each pair of duplicates.

**Table S2b.** Distribution of urinary metabolites (ng/ml) for 30 plastic-plastic duplicates.

|               | <b>N &gt; MDL (%)<sup>a</sup></b> | <b>GM (95% CI)</b> | <b>Minimum</b> | <b>25th Pctl</b> | <b>50th Pctl</b> | <b>75th Pctl</b> | <b>Maximum</b> |
|---------------|-----------------------------------|--------------------|----------------|------------------|------------------|------------------|----------------|
| <b>BCIPP</b>  | 0 (0)                             | <MDL               | <MDL           | <MDL             | <MDL             | <MDL             | <MDL           |
| <b>BDCIPP</b> | 29 (97)                           | 0.69 (0.43, 1.13)  | <MDL           | 0.24             | 0.60             | 1.74             | 10.38          |
| <b>DPHP</b>   | 28 (93)                           | 0.79 (0.42, 1.48)  | <MDL           | 0.25             | 0.81             | 1.41             | 340.36         |
| <b>ip-PPP</b> | 22 (73)                           | 0.24 (0.14, 0.39)  | <MDL           | 0.06             | 0.26             | 0.68             | 4.00           |
| <b>tb-PPP</b> | 7 (23)                            | <MDL               | <MDL           | <MDL             | <MDL             | <MDL             | 0.47           |

<sup>a</sup>Each pair of duplicates was considered >MDL when one or more duplicate was >MDL.

Summary statistics calculated using geometric mean concentrations from each pair of duplicates.

BDCIPP, DPHP and ip-PPP were detected among all of the 31 (100%) glass aliquots but only 29 (94%) of the plastic duplicates; this difference was not statistically significant ( $p=0.49$ , Fisher's exact test). Detection frequencies and GM concentrations were similar to other adult populations in the U.S. and Norway [9, 10, 27, 28] and lower than measured in pooled samples from an Australian study [29] (Supplemental Table S2).

1 **Table S2.** Comparison of GM (95% CI) concentrations of urinary PFR metabolites (ng/ml).

| Region (sample size)                    | Year      | BDCIPP                         | DPHP                          | ip-PPP            | Reference                  |
|-----------------------------------------|-----------|--------------------------------|-------------------------------|-------------------|----------------------------|
| Massachusetts (n=50)                    | 2005-2015 | 0.37 (0.32-0.42)               | 1.5 (1.13, 2.0)               | 0.43 (0.35, 0.54) | This study                 |
| California (n=28)                       | 2015      | 3.3 (2.5, 4.2)                 | 1.2 (0.97, 1.5)               | 2.0 (1.5, 2.5)    | Butt et al. (in press)     |
| New Jersey (n=22)                       | 2013-2014 | 2.4 (1.5, 3.7)                 | 1.9 (1.1,3.4)                 | 0.85 (0.67, 1.1)  | Butt et al. (2014)         |
| North Carolina (n=53)                   | 2012      | 0.63 (0.49, 0.81) <sup>a</sup> | 1.7 (1.36, 2.18) <sup>a</sup> | NR                | Hoffman et al. (2015)      |
| United States (n=9)                     | 2011      | 0.41 (NR)                      | 3.0 (NR)                      | NR                | Cooper et al. (2011)       |
| Massachusetts (n=29)                    | 2009      | 0.41 (0.28, 0.59)              | 1.9 (1.2, 3.0) <sup>b</sup>   | NR                | Carignan et al. (2013)     |
| Massachusetts (n=45)                    | 2002-2007 | 0.13 (NR)                      | 0.31 (NR)                     | NR                | Meeker et al. (2013)       |
| California (n=14)                       | 2011      | 0.09 <sup>c,d</sup> (NR)       | 0.44 <sup>c,d</sup> (NR)      | NR                | Dodson et al. (2014)       |
| Norway (n=48) <sup>e</sup>              | 2012      | 0.12 <sup>e</sup> (NR)         | 0.51 <sup>e</sup> (NR)        | NR                | Cequier et al. (2015)      |
| Australia (n=924, pooled) <sup>f</sup>  | 2010-2011 | 1.00 <sup>c</sup> (NR)         | 24.4 <sup>c</sup> (NR)        | NR                | Van den Eede et al. (2015) |
| Australia (n=2300, pooled) <sup>g</sup> | 2012-2013 | 0.66 <sup>c</sup> (NR)         | 64.4 <sup>c</sup> (NR)        | NR                | Van den Eede et al. (2015) |

2 Normalized using a mean specific gravity of 1.024 unless otherwise indicated

3 NR=Not reported

4 <sup>a</sup>Confidence intervals obtained from study authors, n=52 for TBBA

5 <sup>b</sup>Previously unpublished data obtained from the authors

6 <sup>c</sup>Not SG normalized

7 <sup>d</sup>Median concentrations

8 <sup>e</sup>Normalized using a mean specific gravity of 1.015, 244 urine samples total

9 <sup>f</sup>57 pools of 7 individuals and 20 pools of 28 individuals

10 <sup>g</sup>23 pools of 100 individuals

11
